# Supplementary material for: Factors Influencing the Choice of Specialty by Medical Students in a new University in Rwanda
Source: Research Square preprint supplement (doi:10.21203/rs.3.rs-7048690/v1), 2025-07-22
Supplement: Supplementary file 1 [file 6877d1b771fdc5c4d50349e8.docx]

**Appendix 1**

**Data collection tool**

**Section A: Sociodemographic and background information**

**Age (years):**

**Sex:**

- Male
- Female

**Year of study**

- MBBS Year 1
- MBBS Year 2
- MBBS Year 3
- MBBS Year 4
- MBBS Year 5
- MBBS Year 6

**Nationality**

- Rwandan
- Other (please specify)

**How would you rate your family’s annual income compared to the average income of families in your country?**

- High
- Average
- Low

**Are you the first person in your family to study medicine? (From your immediate family limited to parents and siblings?)**

- Yes
- No

**How do you characterize your original residence? Your geographical location**

- Urban
- Rural

**When did you first begin considering your preferred specialty?**

- Before medical school
- During pre-clinical years
- During clinical years
- During internship

**Do you** **prefer to specialize in Rwanda or abroad?**

- Rwanda
- Abroad
- Either

**How confident are you** **in your ability to choose the right specialty for yourself?**

- Very confident
- Somewhat confident
- Neutral
- Somewhat uncertain
- Very uncertain

**Would you consider working in rural or underserved areas in Rwanda?**

- Yes
- No

**Section B: Specialty preference**

Have you decided on a specialty you would like to pursue after graduation from the MBBS/MGHD program?

- Yes
- No

If yes, which specialty are you considering? Please select the top specialty (only one) of your interest?

- Surgery
- Internal medicine
- OBGYN
- Pediatrics
- Radiology
- ENT/otolaryngology
- Anesthesia and critical care
- Dentistry and oral health
- Dermatology
- Ophthalmology
- Emergency medicine
- Psychiatry and mental health
- Oncology
- Global health/public health
- Other (please specify)

If you are not fully decided, select one potential specialty of preference

- Surgery
- Internal medicine
- OBGYN
- Pediatrics
- Radiology
- ENT/otolaryngology
- Anesthesia and critical care
- Dentistry and oral health
- Dermatology
- Ophthalmology
- Emergency medicine
- Psychiatry and mental health
- Oncology
- Global health/public health
- Other (please specify)

**Section C: Influencing factors**

**How important are the following factors in influencing your choice of specialty?** *(Rate each from 1=Not Important to 5=Very Important)*

- Personal interest in the specialty
- Financial rewards in the specialty
- Work-life balance
- Job opportunities
- Influence of mentors/supervisors
- Prestige associated with the specialty
- Family expectations
- Opportunity to work in rural/underserved areas
- Length of training required
- Research opportunities
- Opportunity for teaching
